# Supplementary material for: Inhibiting DNA methylation switches adipogenesis to osteoblastogenesis by activating Wnt10a
Source: PubMed Central journal article supplement (PMC4853709; doi:10.1038/srep25283), 2016-05-03

**Inhibiting DNA methylation switches adipogenesis to osteoblastogenesis by activating Wnt10a**

Yii-Shyuan Chen, Rui Wu, Xiaosong Yang, Shuping Kou, Ormond A. MacDougald, Liqing Yu, Hang Shi and Bingzhong Xue

Supplemental Table 1. Amplification and Sequencing primers for Wnt10a

| Primers                         | Sequences                           |
|---------------------------------|-------------------------------------|
| Amplification primer 1: Forward | 5'- GGTGGGGTTGGGTTAGATAGT-3'        |
| Amplification primer 1: Reverse | 5'- ACTACCACACACAACCTCCTACTCA-3'    |
| Amplification primer 2: Forward | 5'- AGGGGTTTTTGGGAAATTTTTTG-3'      |
| Amplification primer 2: Reverse | 5'- ACTACCACACACAACCTCCTACTCA-3'    |
| Amplification primer 3: Forward | 5'- TGTTGAGGGAGTTGTGATTTGAGTAG-3'   |
| Amplification primer 3: Reverse | 5'- CCTAAAAAATCCTAACTCTCCAAAAAAC-3' |
| Sequencing primer 1             | 5'- GGTTGGGTTAGATAGTAT-3'           |
| Sequencing primer 2             | 5'- GTTGGGGTGGGGGGT-3'              |
| Sequencing primer 3             | 5'- ATTTTTGTGTTAGGAGG-3'            |
| Sequencing primer 4             | 5'-ACTCCTACTCAAATCAC-3'             |
| Sequencing primer 5             | 5'- TGTGATTTGAGTAGGAG-3'            |
| Sequencing primer 6             | 5'-AGTTTTTTATTTTTGGTTTGT-3'         |

### **Supplemental Figure Legends**

**Supplemental Figure 1.** Schematic illustration of the Wnt10A promoter and 5'-end region. The transcription start site is indicated as +1, while the translation start site is shown as ATG. TATA box, C/EBP, CAAT box and exon 1 are indicated. The 33 CpG sites measured in this study are indicated as upward vertical lines in exon 1. F1/R1, F2/R2, and F3/R3 represent the forward and reverse primers of amplification RCR for pyrosequencing analysis.

# Supplemental Figure 1

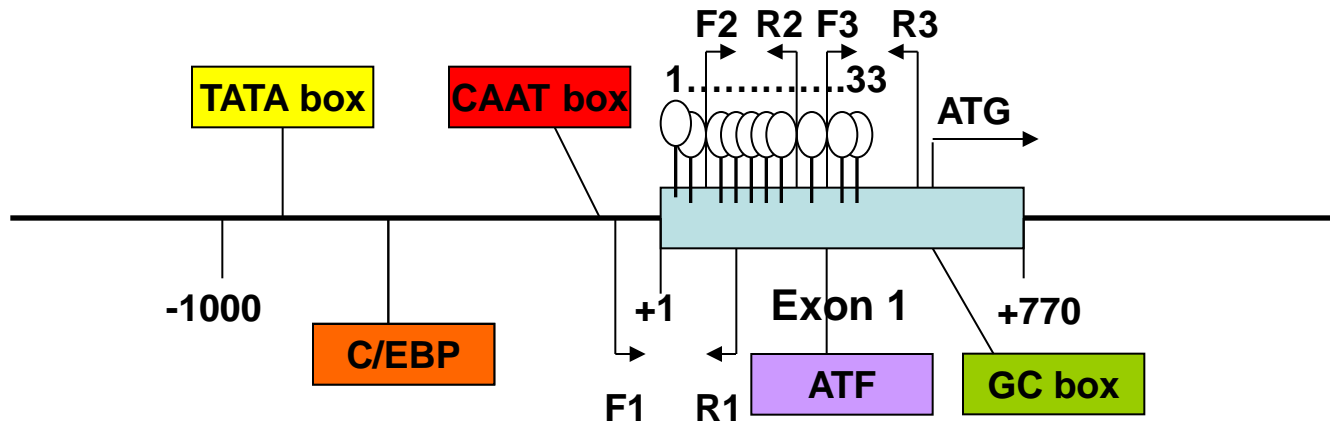

Supplement: srep25283-s1.pdf [file srep25283-s1.pdf]
